# Supplementary material
Source: publisher figshare collection journal article supplement (https://frontiersin.figshare.com/ndownloader/files/31557761)

## Uninfected control

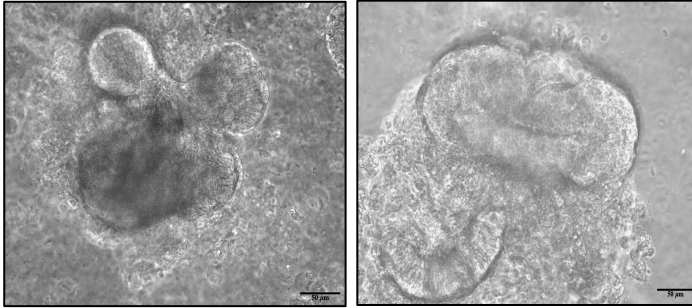

## Chronic SIV

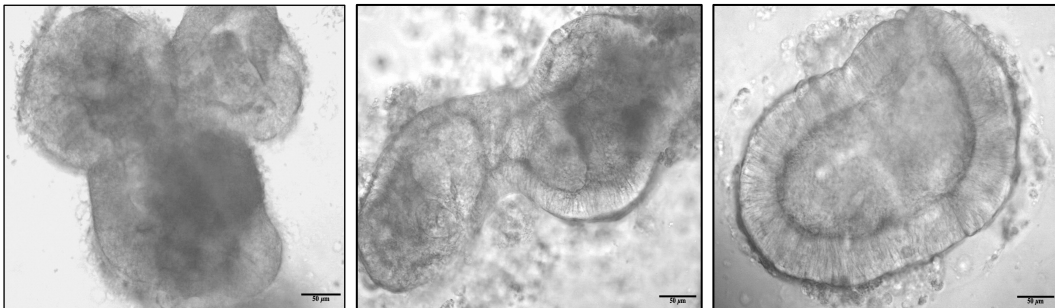

Supplement: Supplementary file [file 31557761]
